# Supplementary material for: Noninvasive assessment of the repair process in diabetic wound healing using multimodal imaging techniques
Source: Research Square preprint supplement (doi:10.21203/rs.3.rs-8616724/v1), 2026-02-22
Supplement: Supplementary file 1 [file 9fe00b8ad88f79219e7dfbef.docx]

**Supplemental figures**


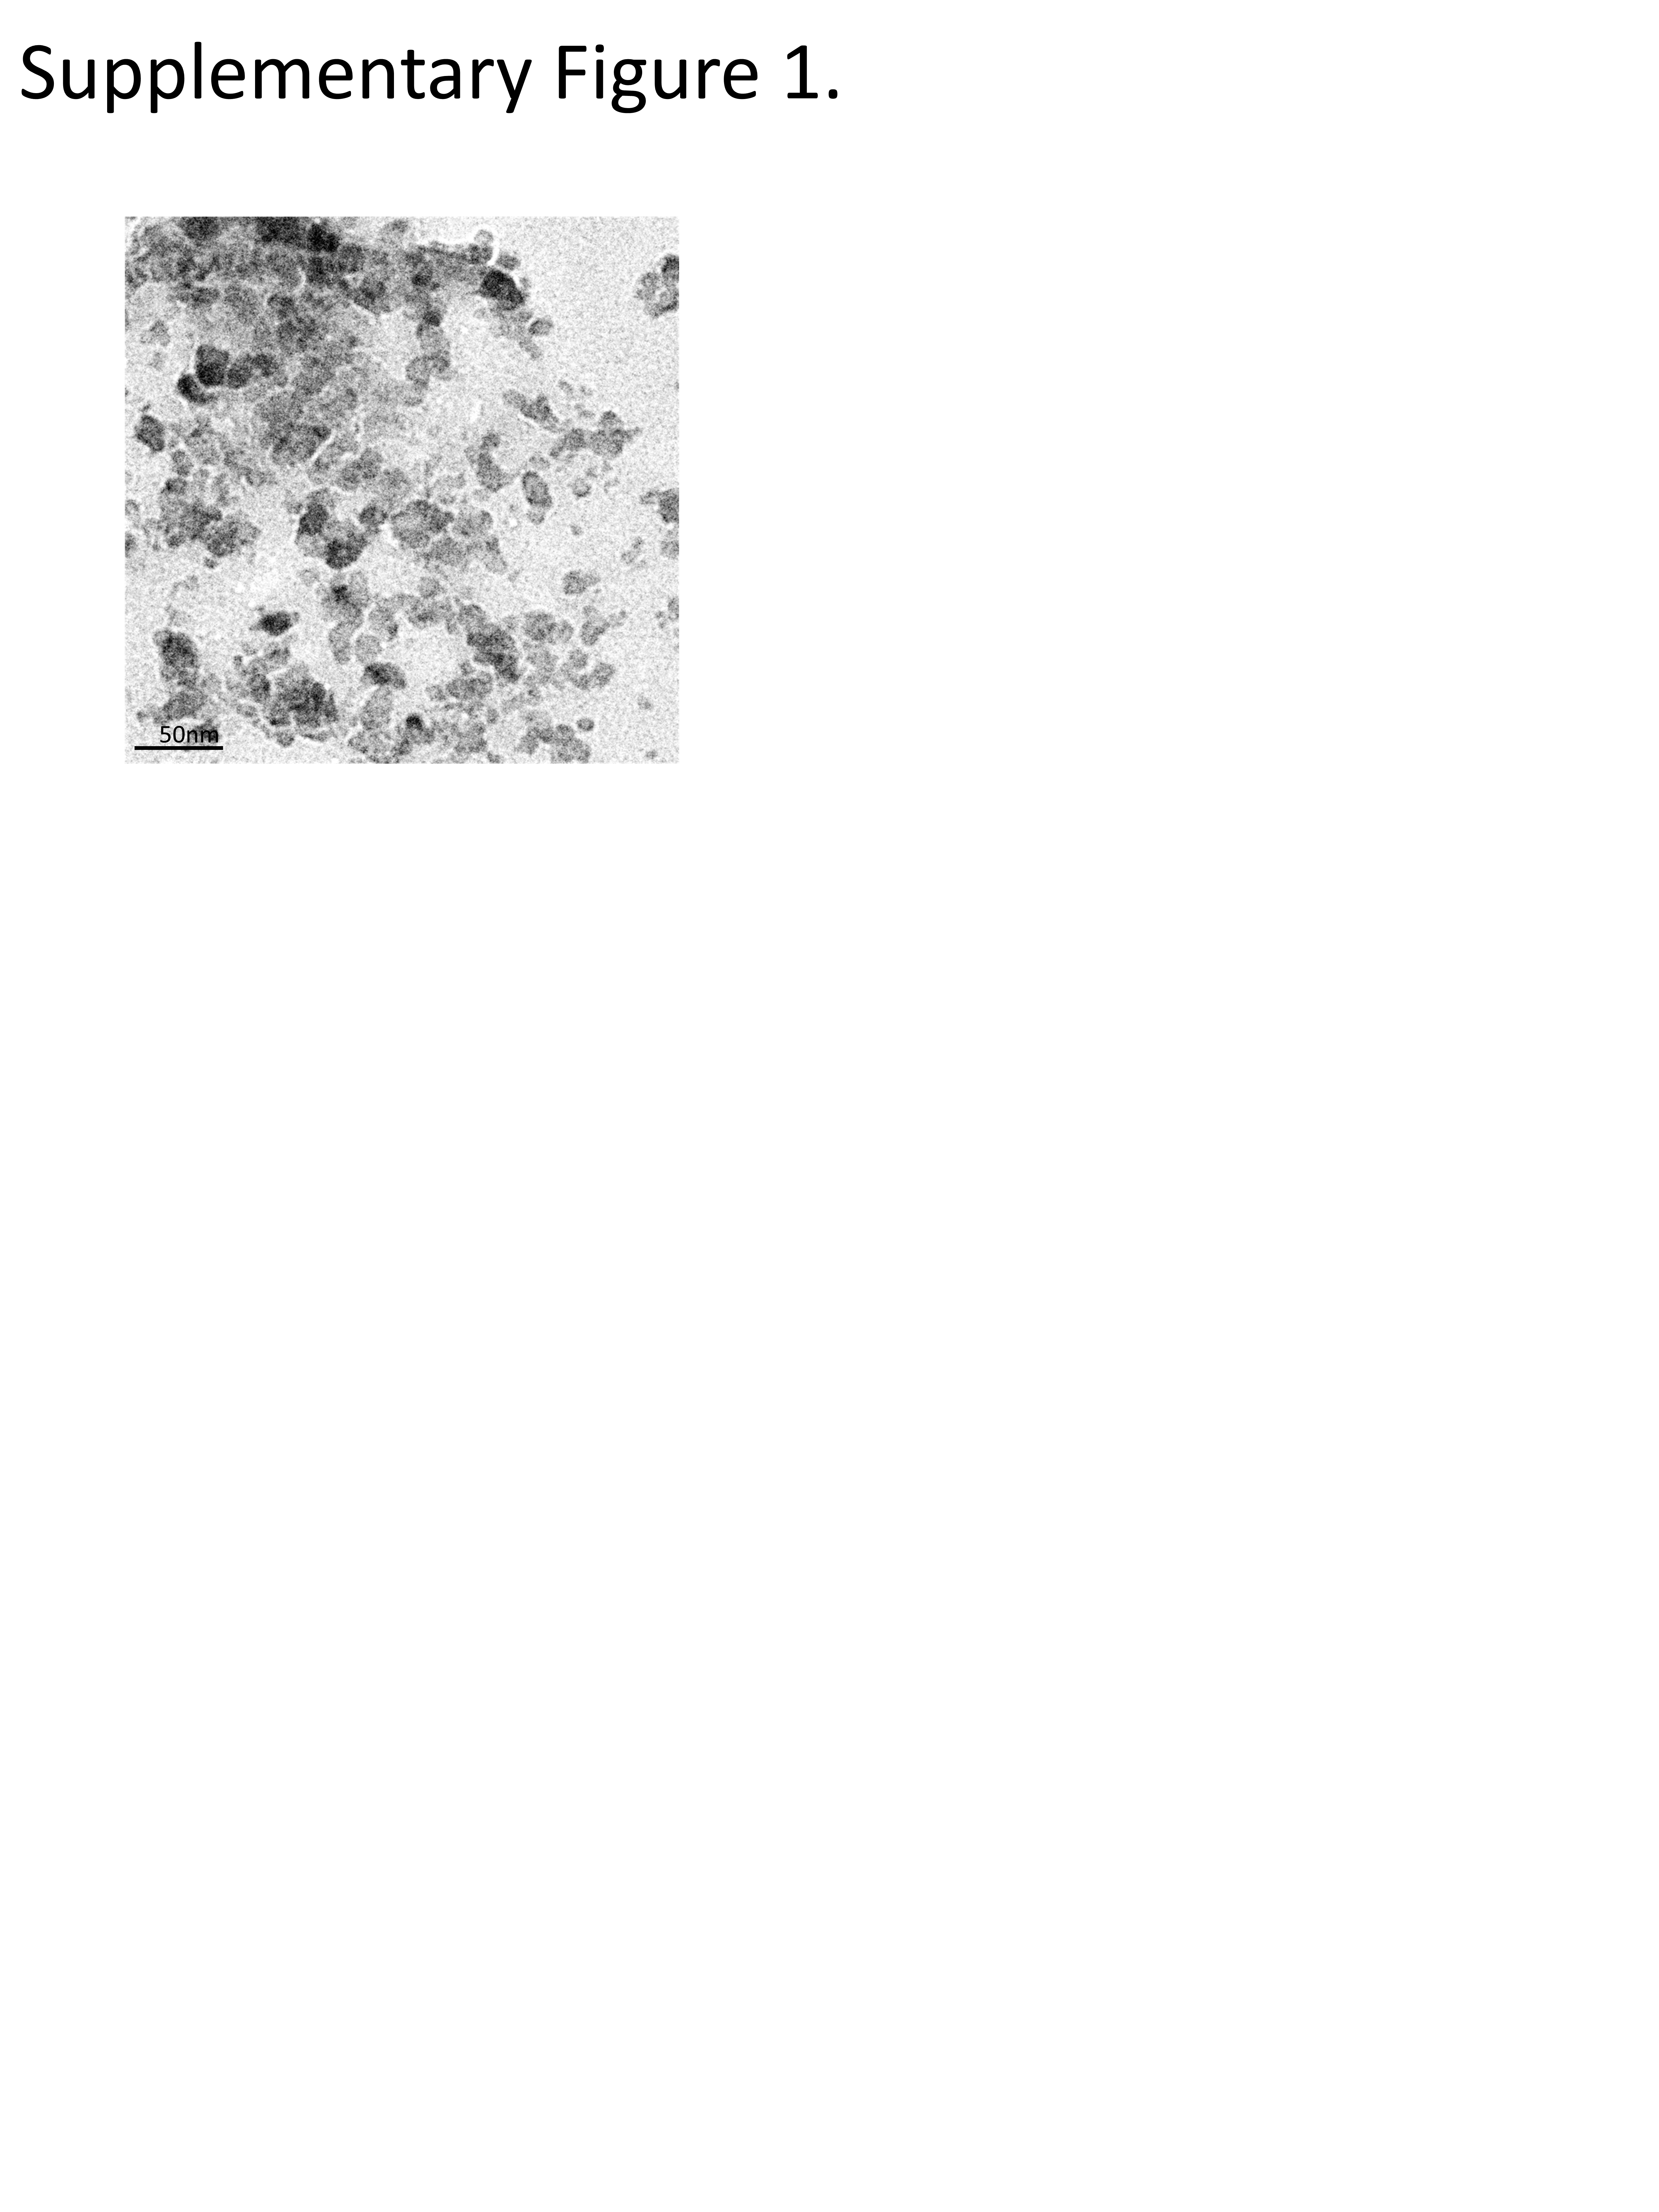


**Supplementary Figure 1.** The transmission electron microscopy (TEM) image of Zn2+ reagent. (Scale bar: 50nm)


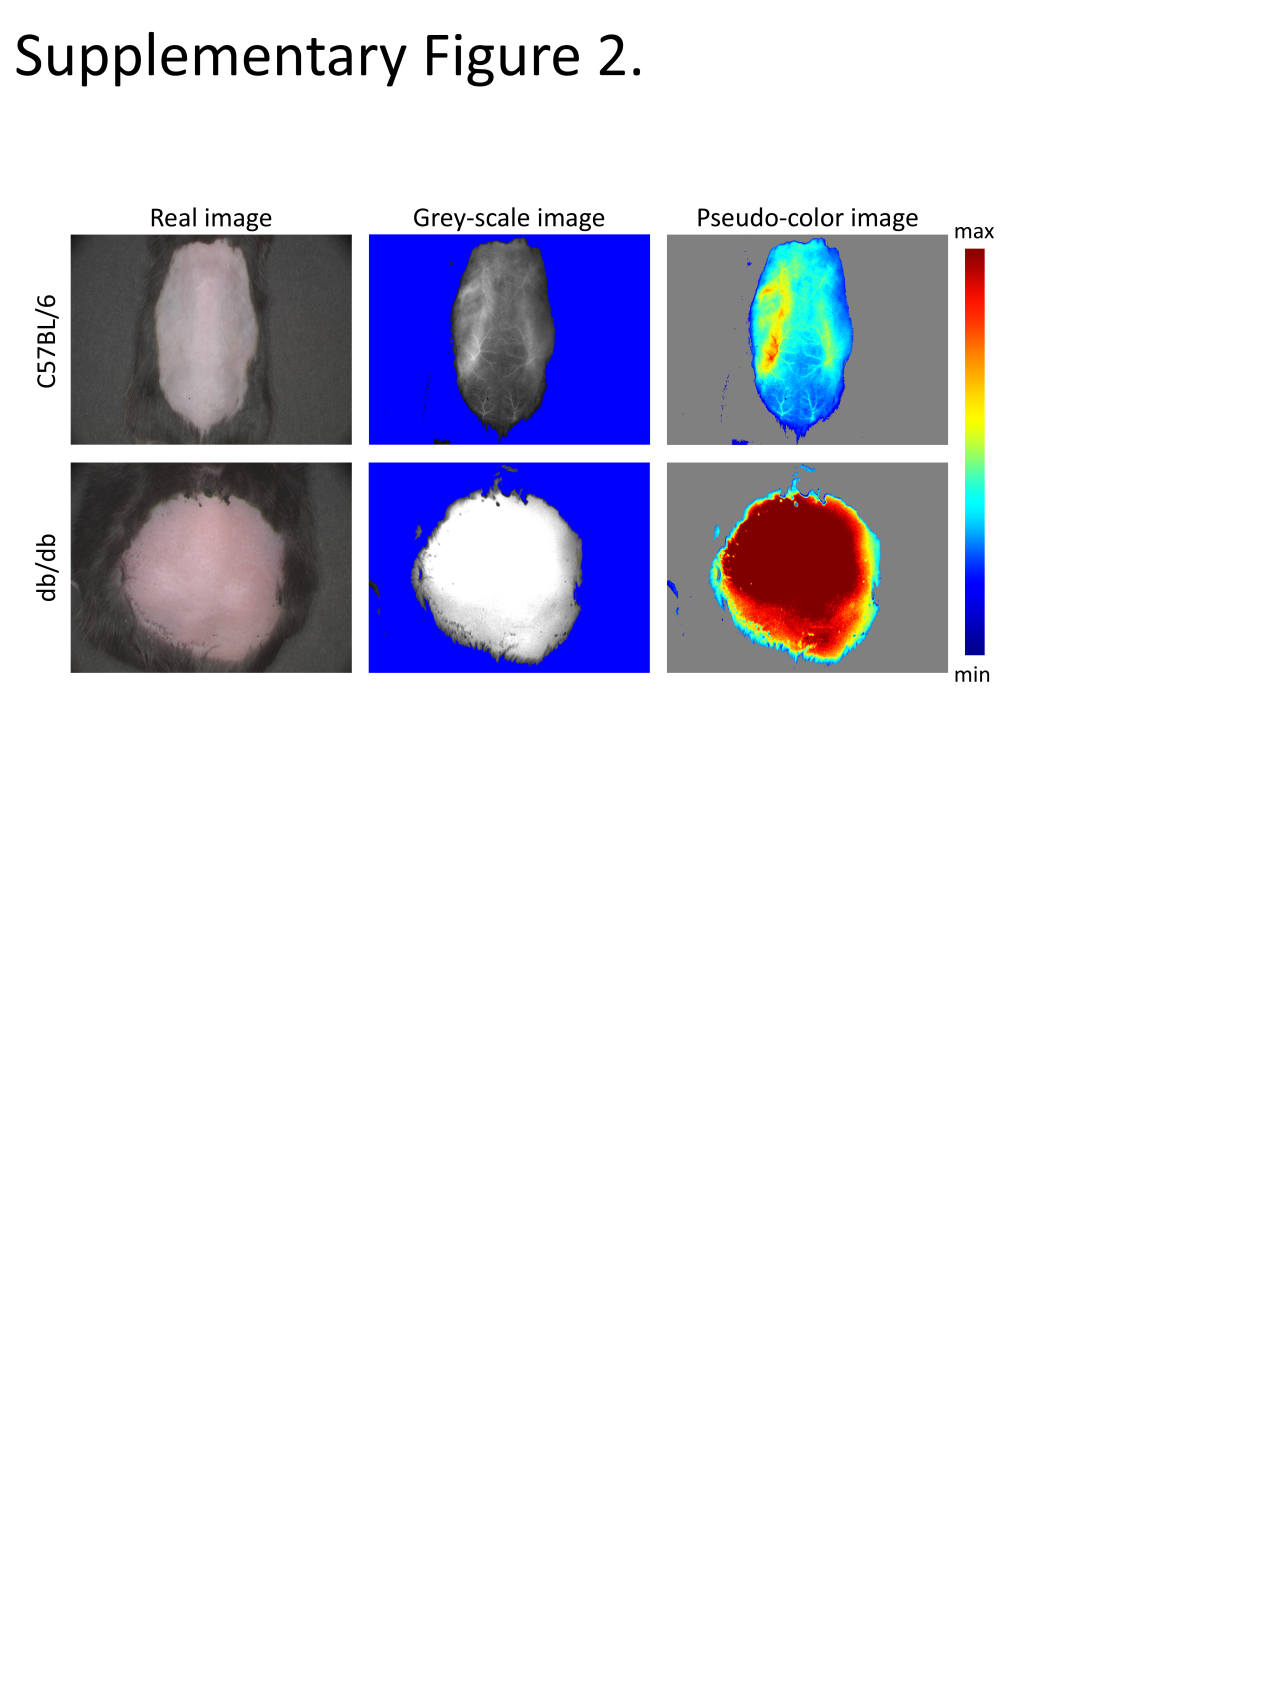


**Supplementary Figure 2.** Gray-scale images and pseudo-color images of LSCI in normal C57BL/6 mice and db/db mice.


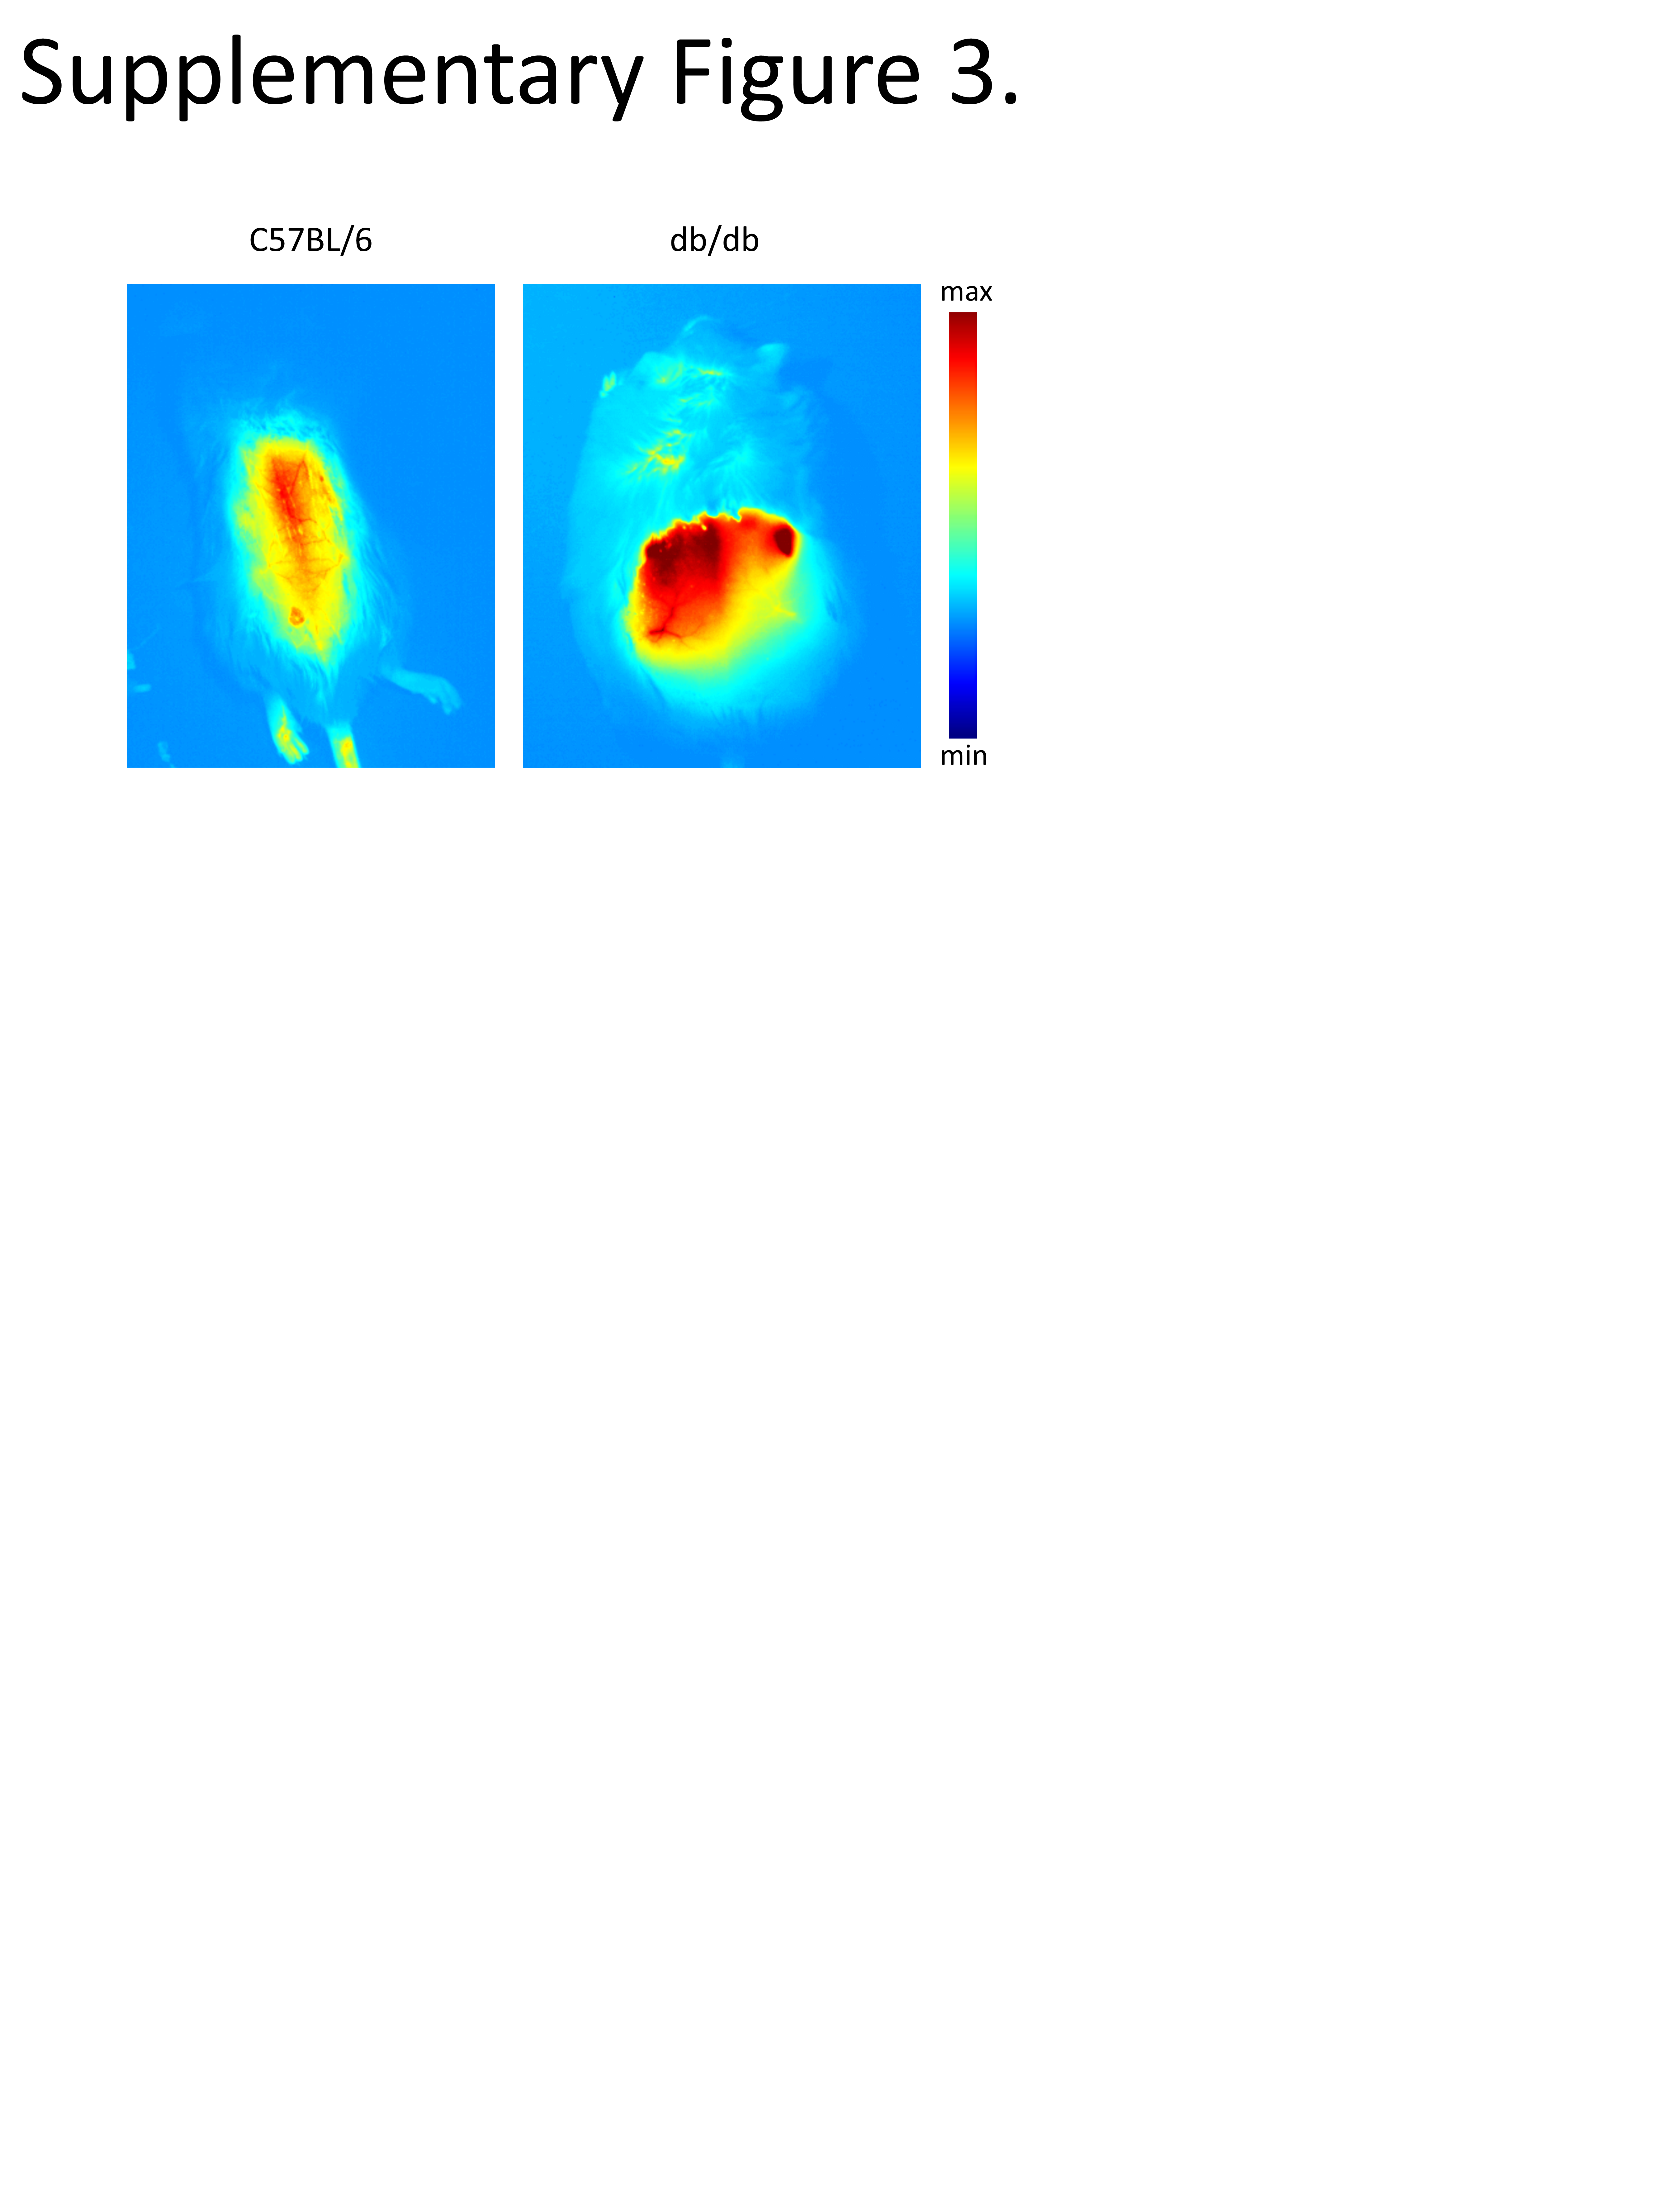


**Supplementary Figure 3.** Pseudo-color images of NIR-II imaging in normal C57BL/6 mice and db/db mice.


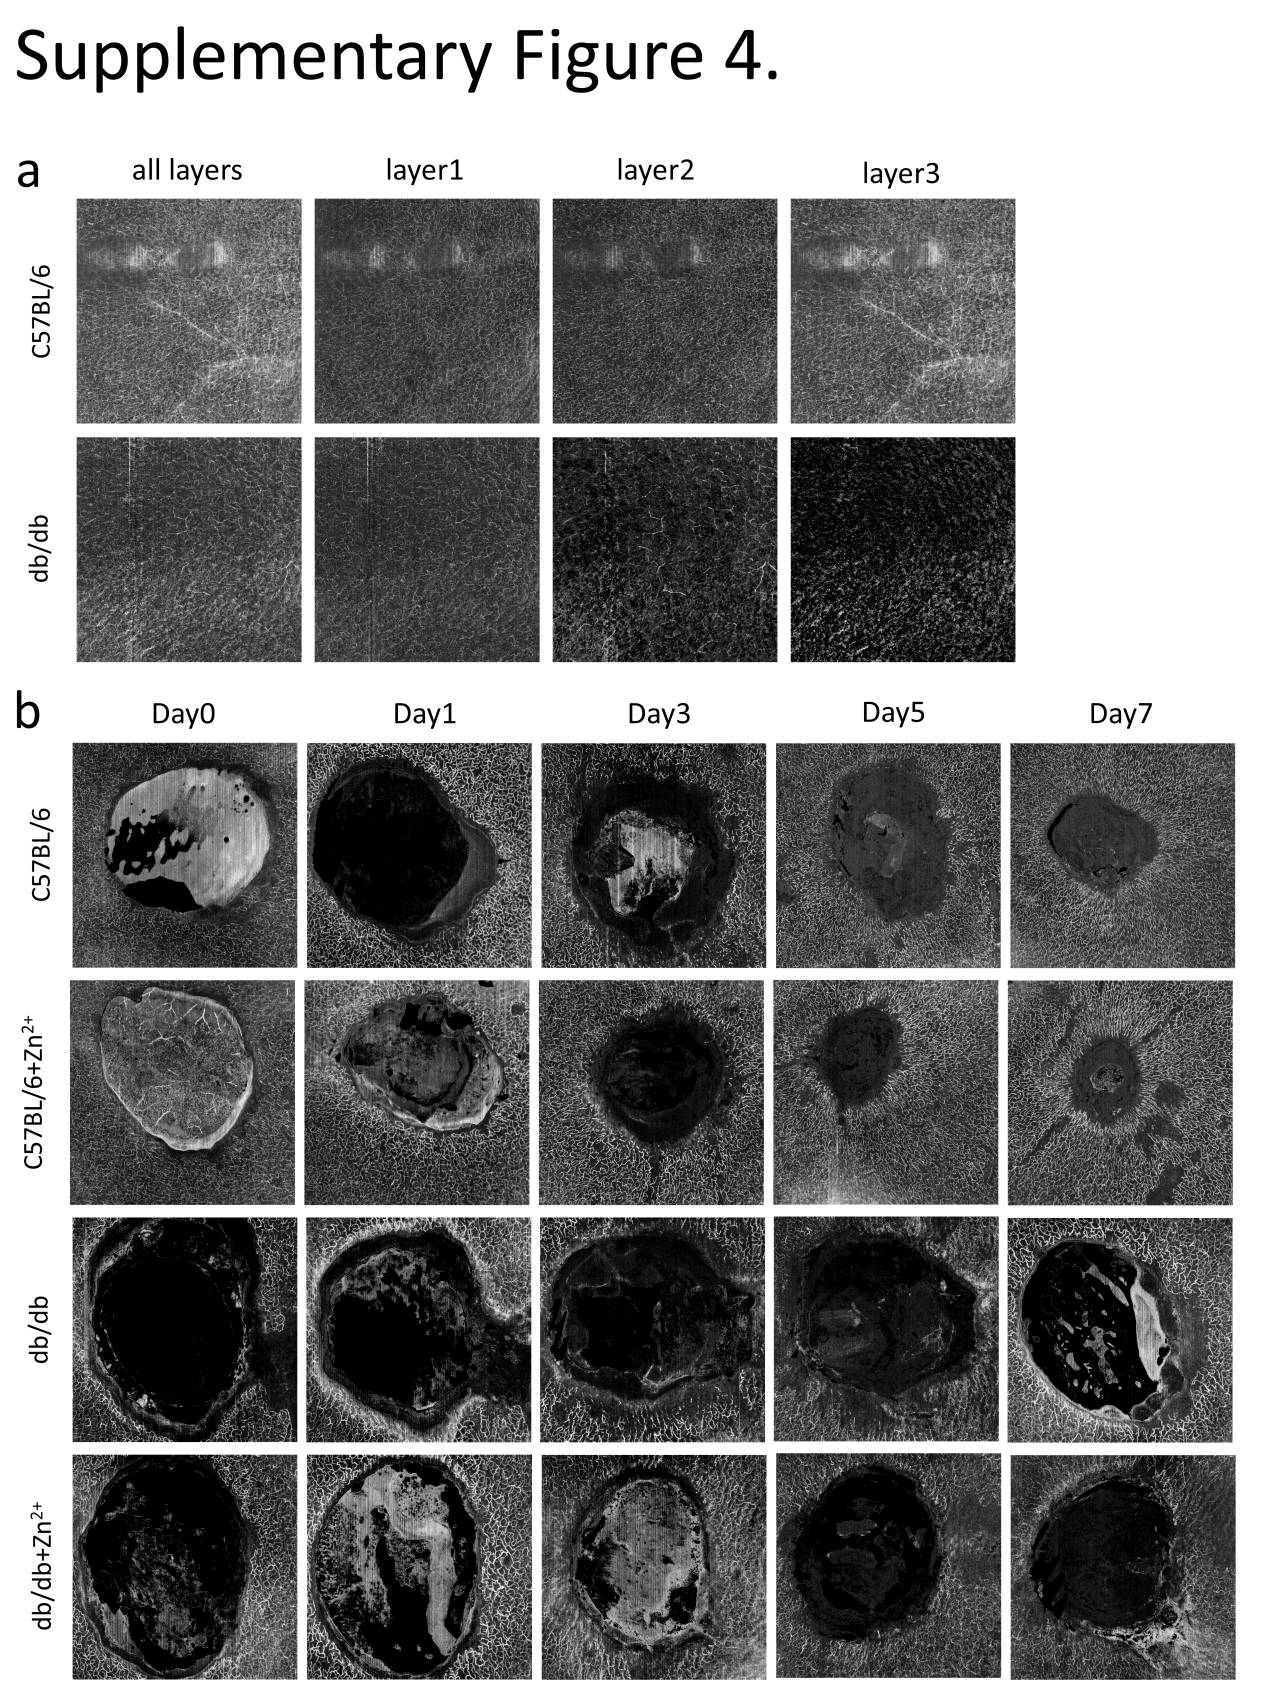


**Supplementary Figure 4.** **(a)** Representative all layers, layer1 (0-20μm), layer2 (20-30μm), and layer3 (30-100μm) maps of OCTA in normal C57BL/6 mice and db/db mice. **(b)** Representative mask maps of OCTA of C57BL/6 and db/db mouse wall-healing models on days 0, 1, 3, 5, and 7. 4b. Relationship between blood vessel average area of wound area and time in different treatment groups.


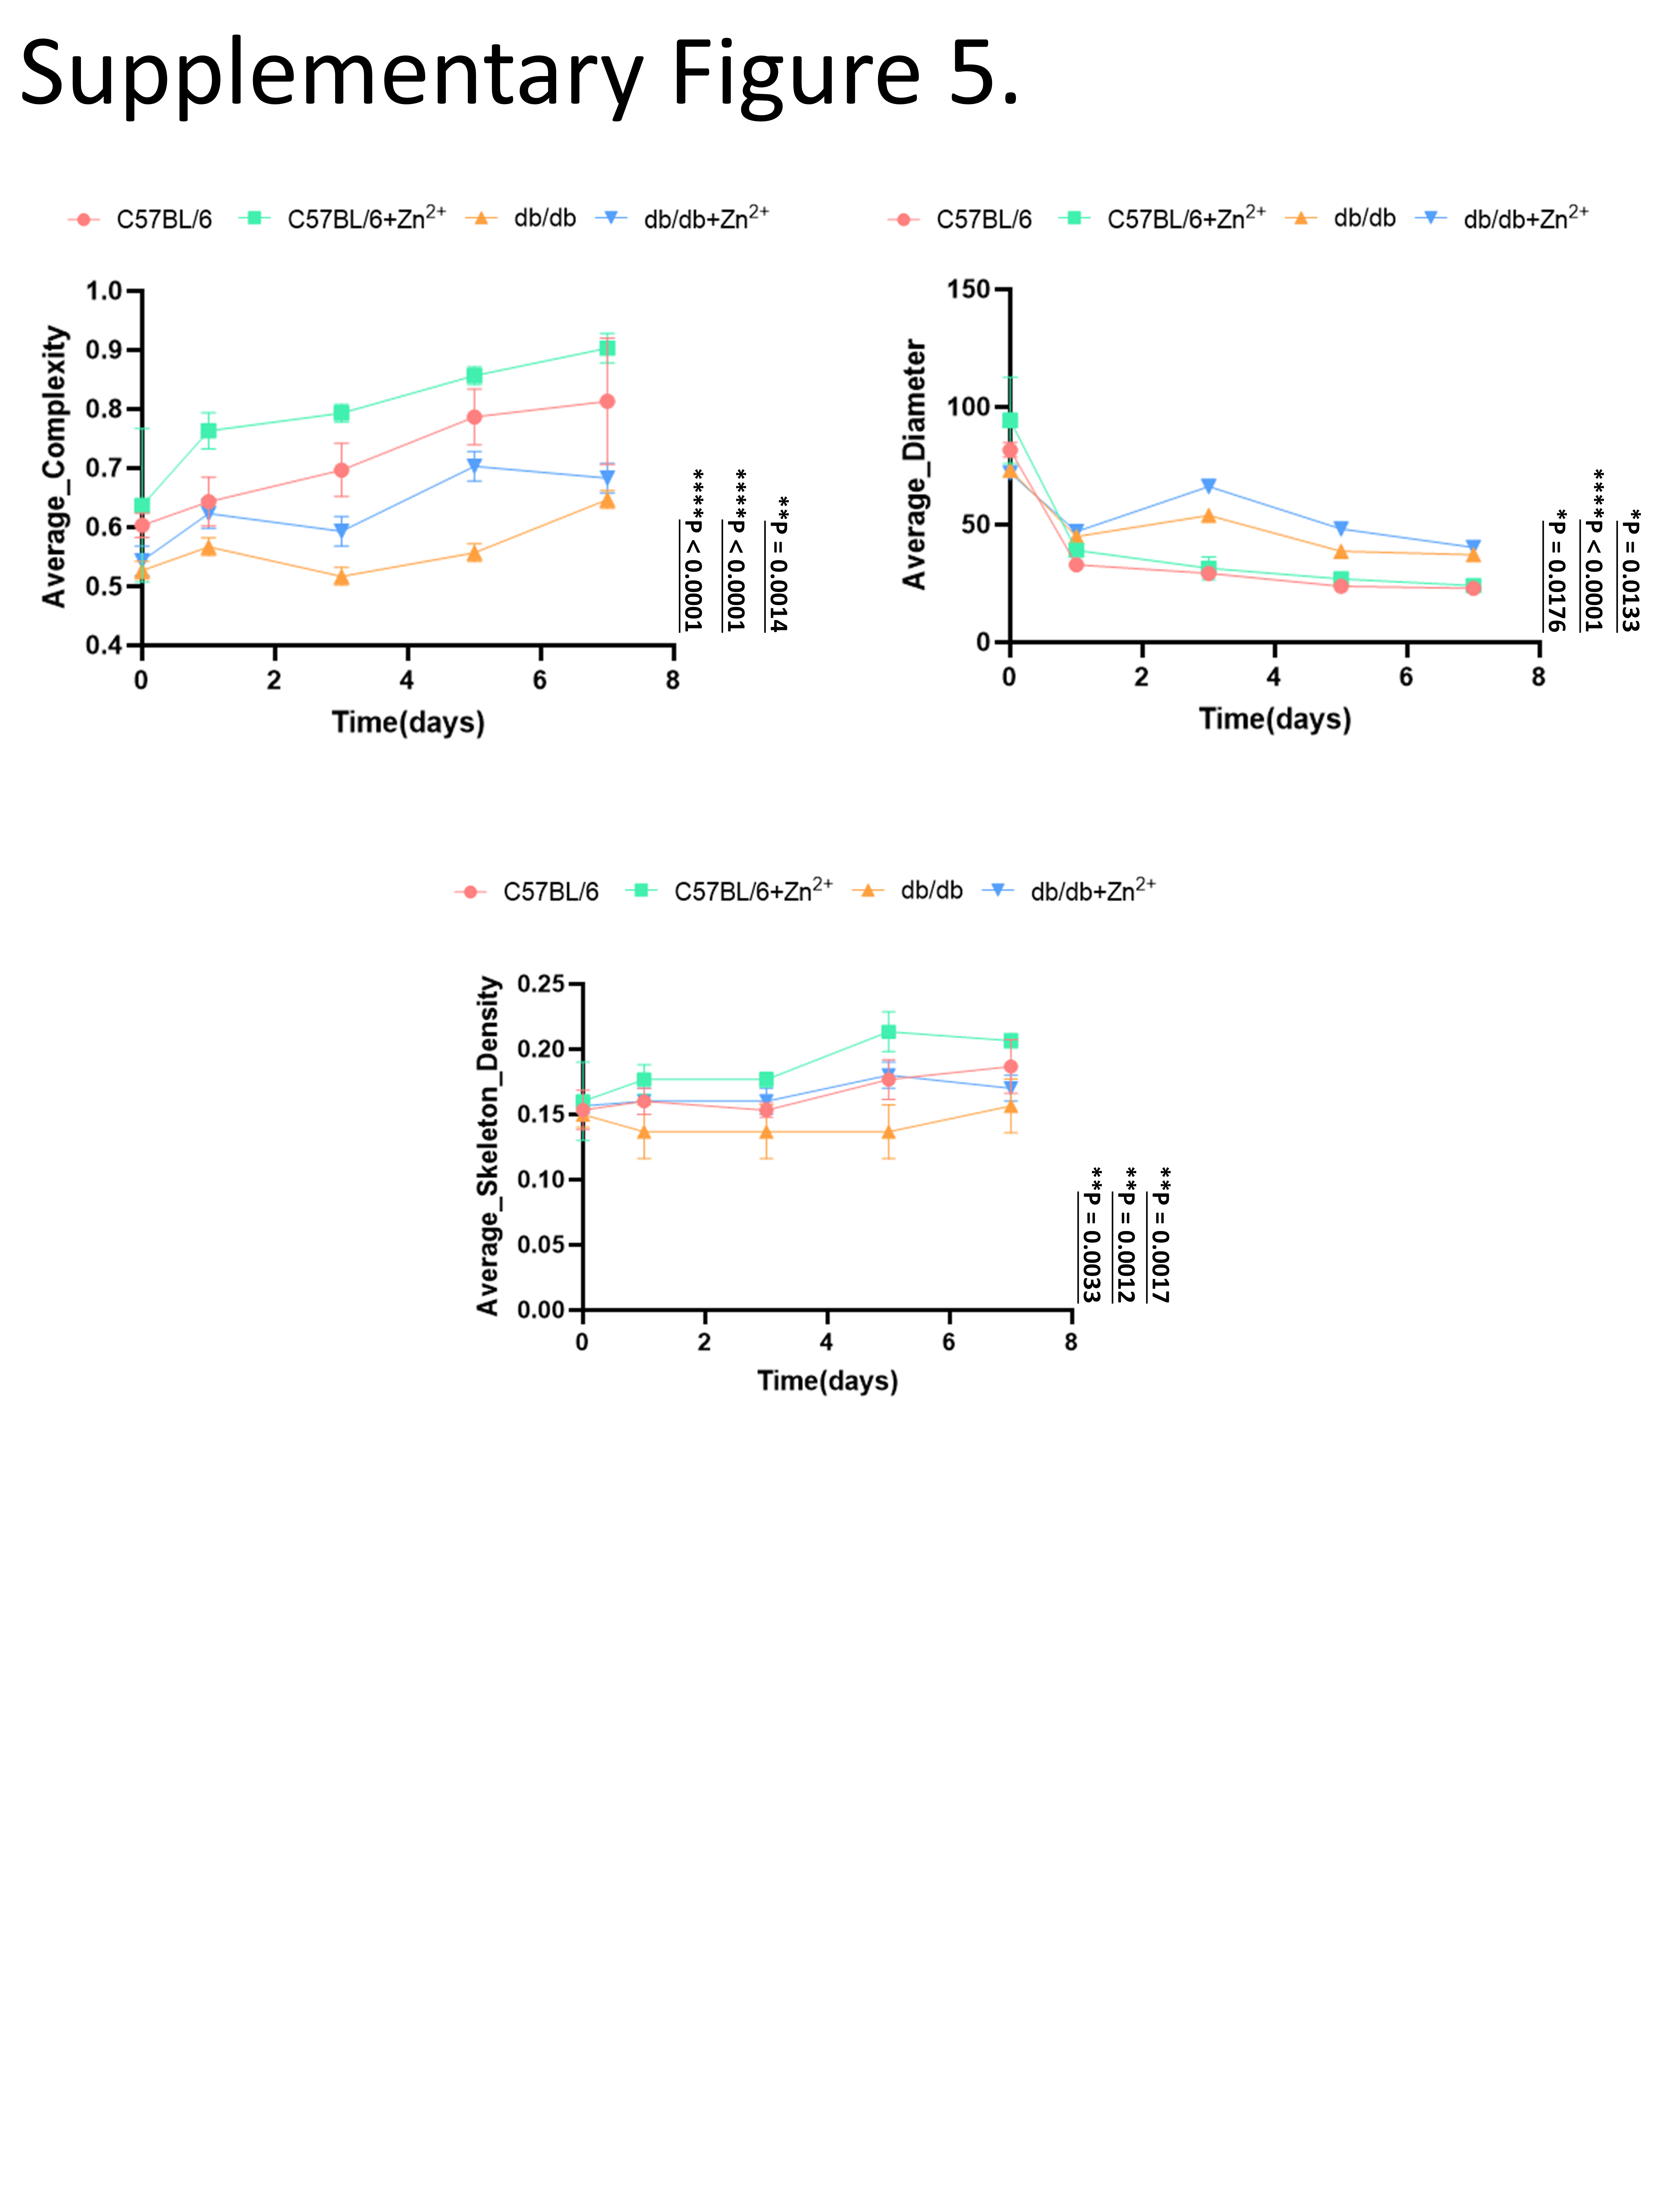


**Supplementary Figure 5.** Relationship between blood vessel average complexity, average diameter, and average skeleton density of wound area and time in different treatment groups (n = 5). ( (*P < 0.05, **P < 0.01, ***P < 0.001, ****P < 0.0001, indicating statistically significant data between groups; ns indicates no statistical significance)
